# Supplementary material for: Measurements and comparison of primary biological aerosol above and below a tropical forest canopy using a dual channel fluorescence spectrometer
Source: Copernicus journal article supplement (doi:10.5194/acp-10-4453-2010), 2010-05-17
Supplement: Supplementary file 1 [file acp-10-4453-2010-supplement.pdf]

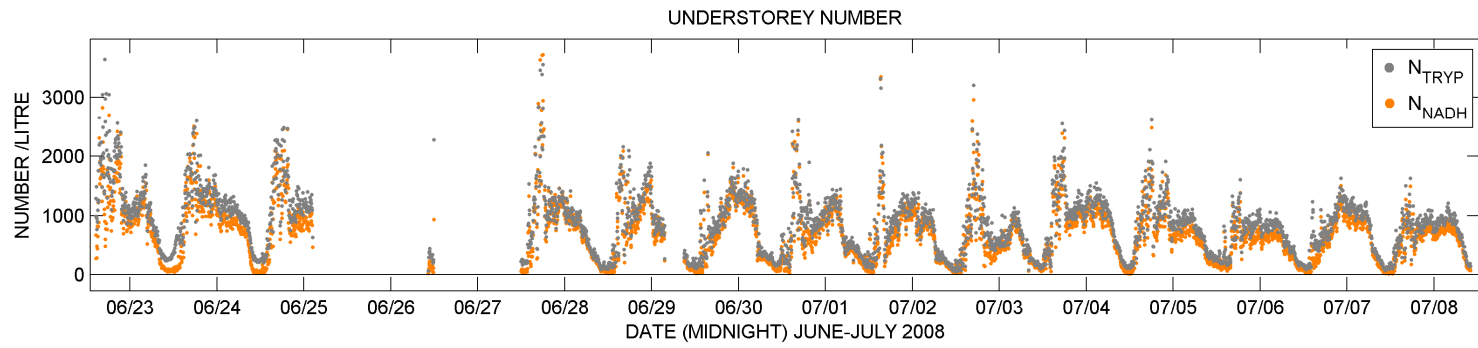

**Figure S1** Number concentration of understorey particles deemed to be exhibiting NADH or Tryptophan-like fluorescence.

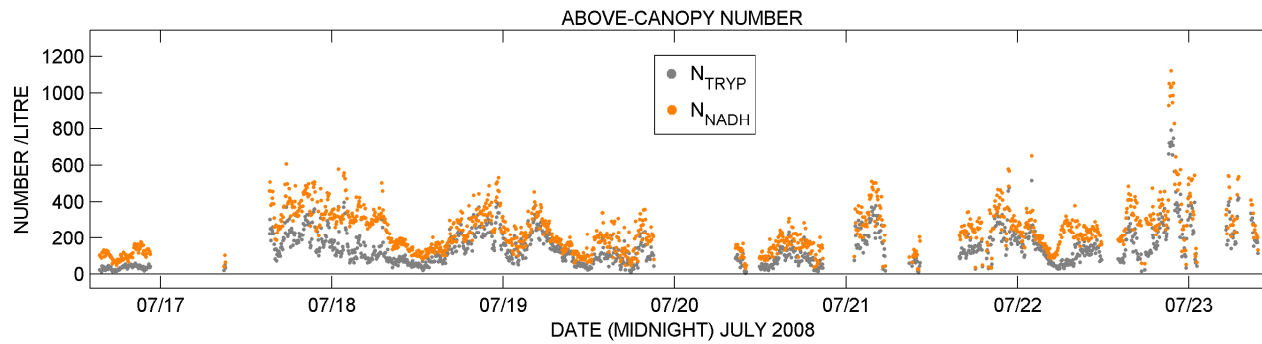

**Figure S2** Number concentration of above-canopy particles deemed to be exhibiting NADH or Tryptophan-like fluorescence.

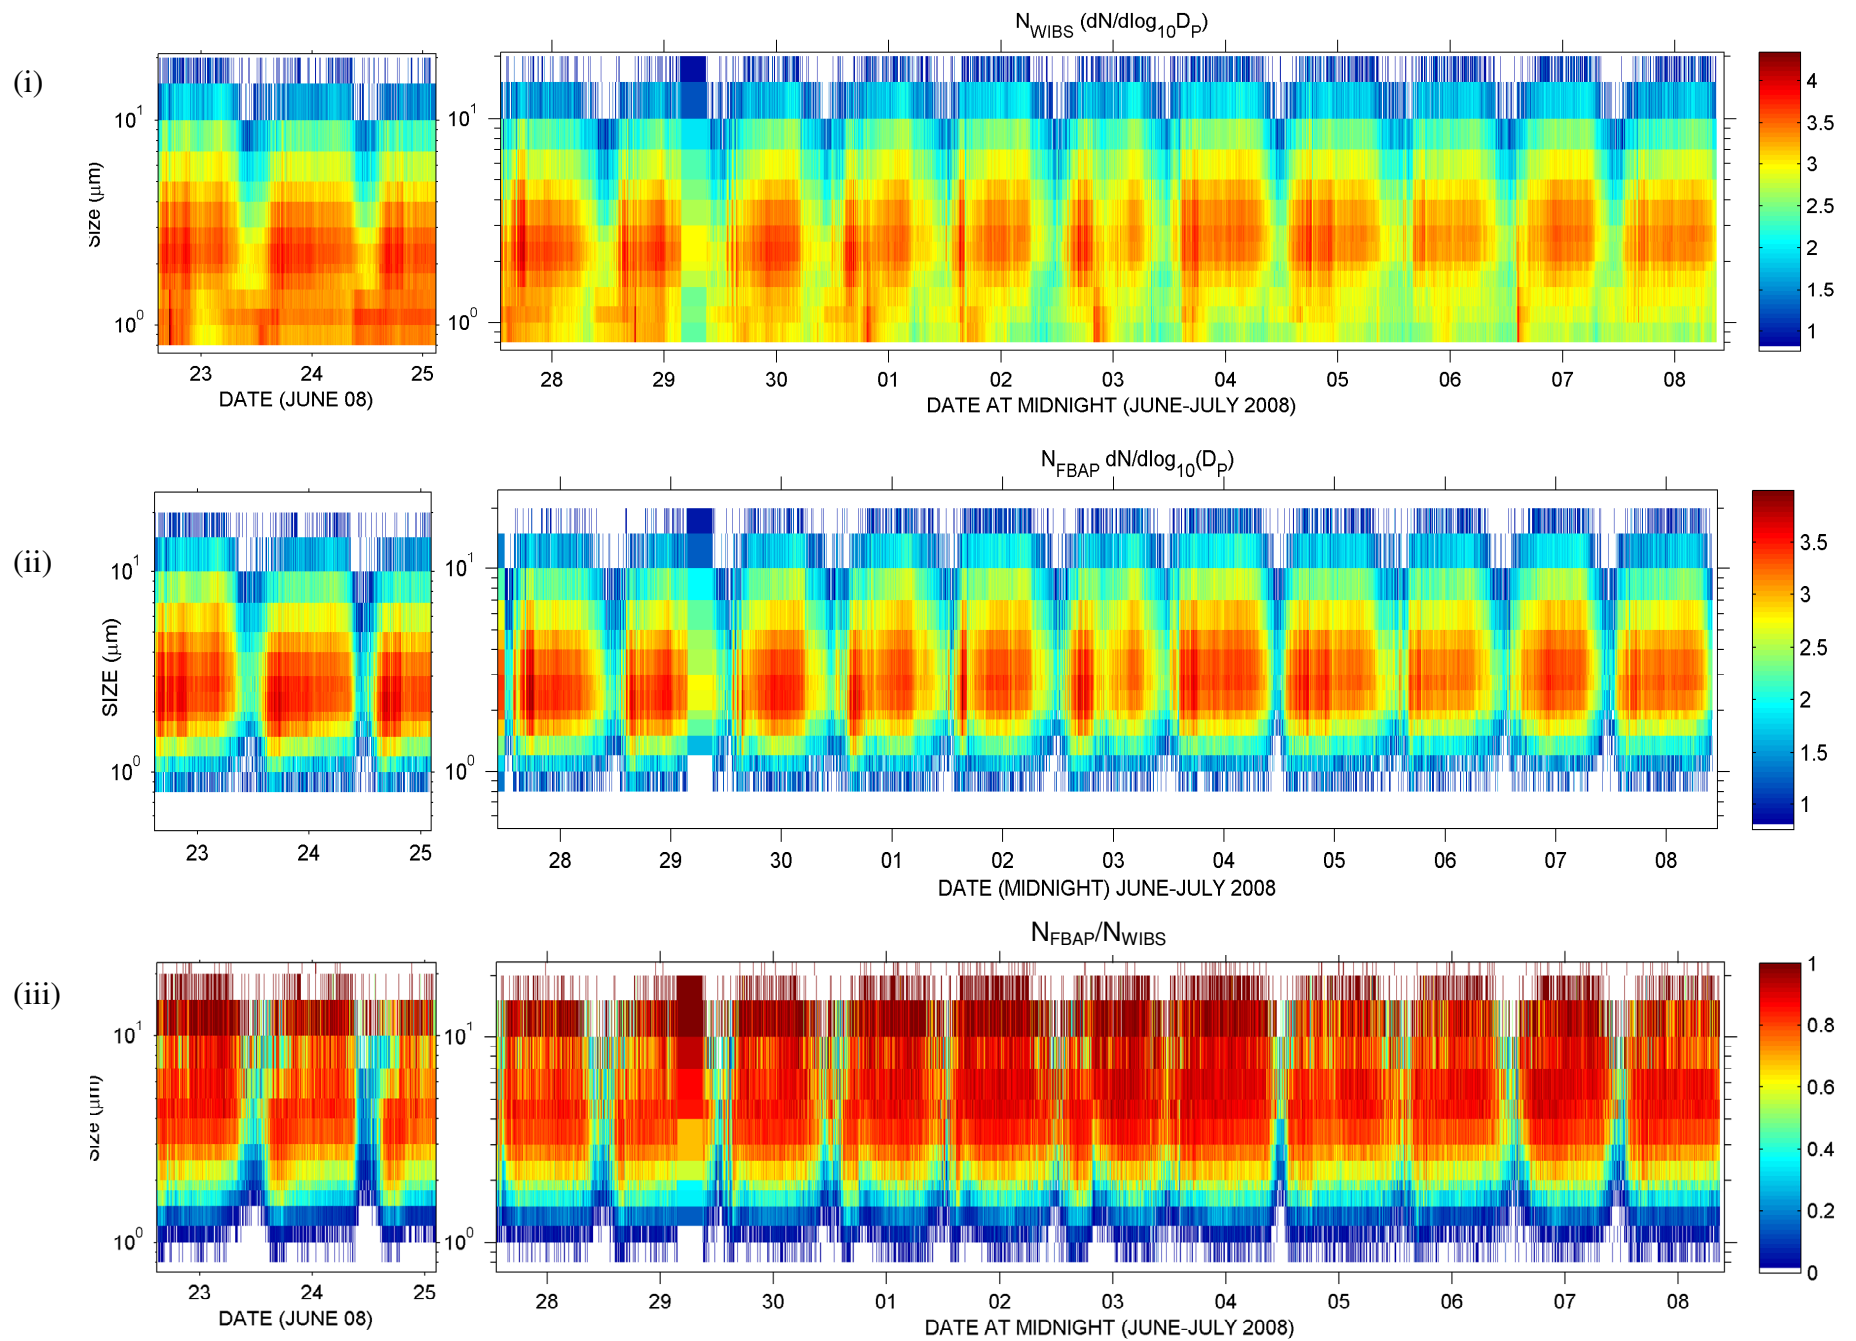

**Figure S3 Time-resolved number size distributions of (i)  $N_{WIBS}$ , (ii)  $N_{FBAP}$  and (iii) the number fraction of  $N_{FBAP}$  in the understorey, June-July 2008**

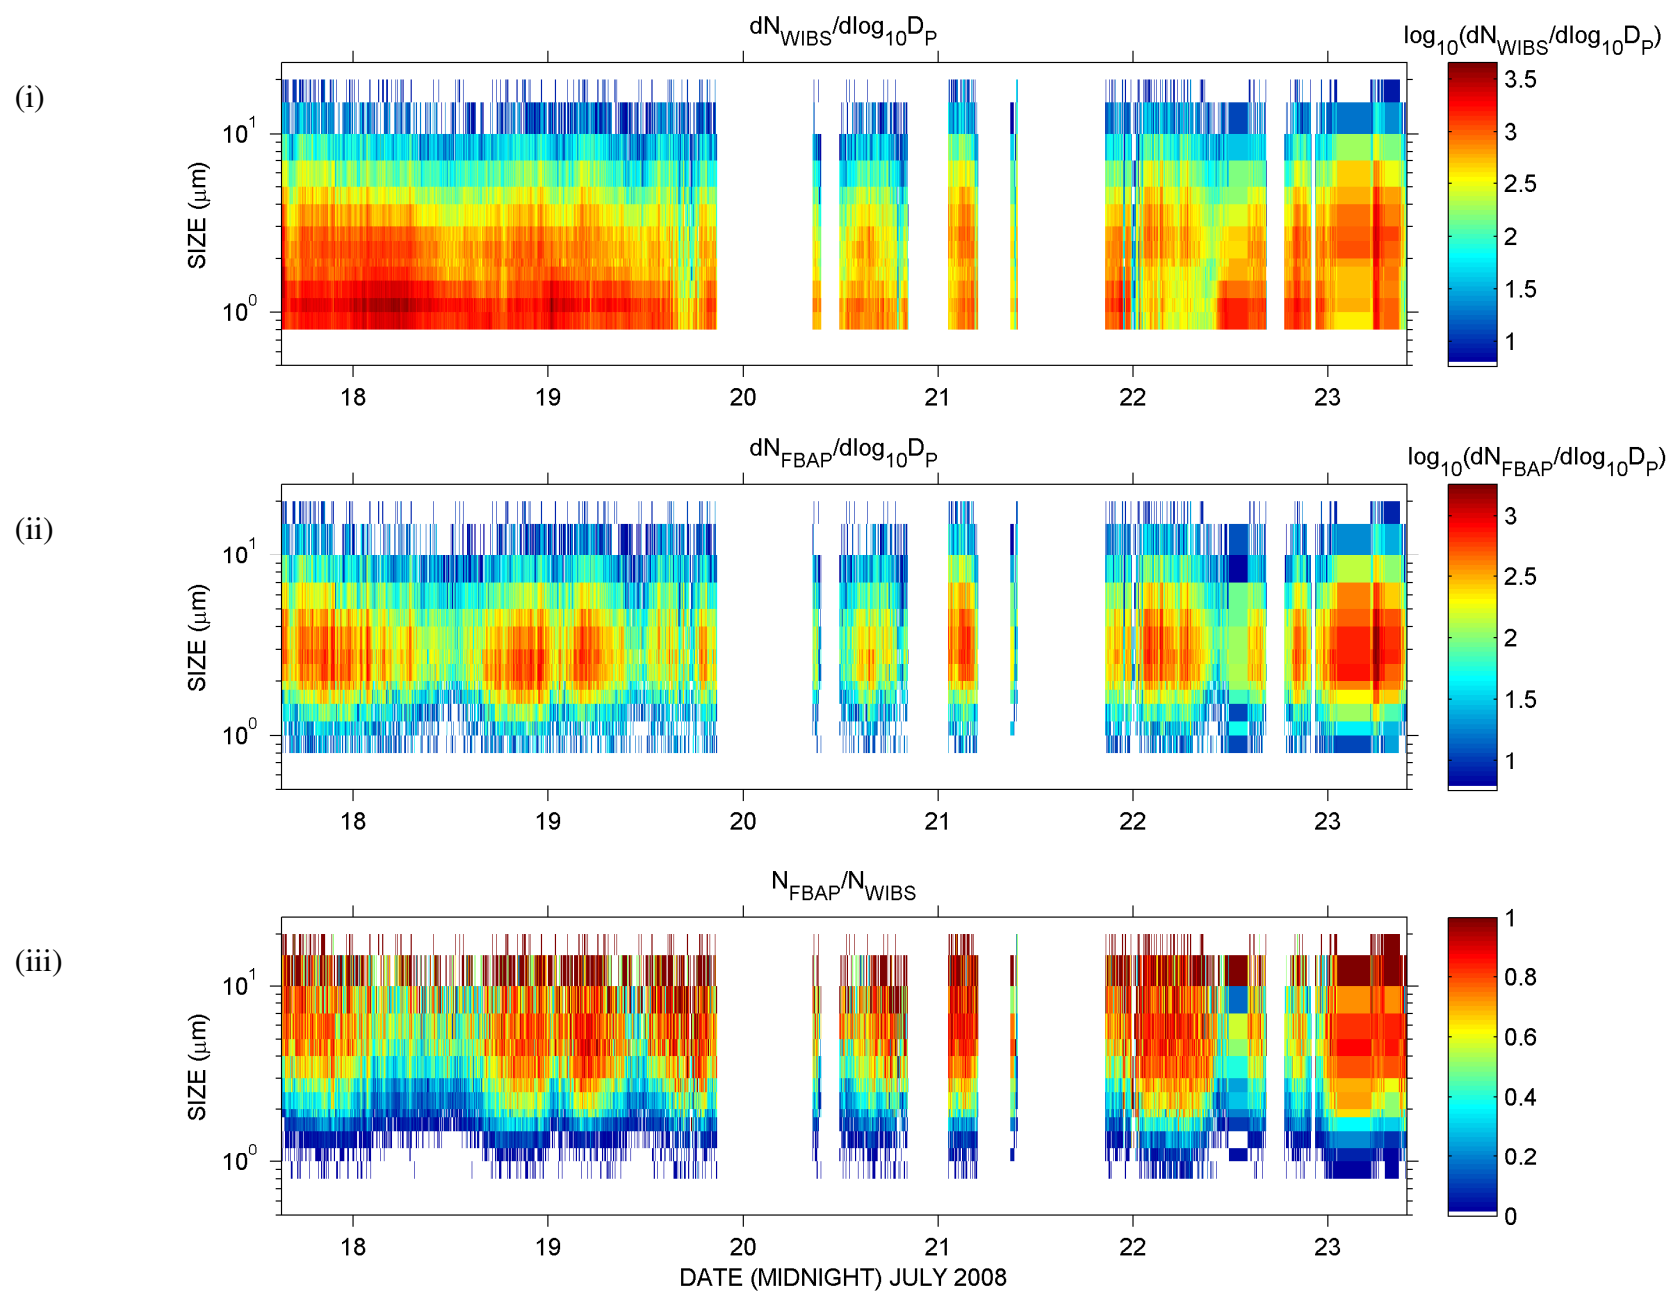

**Figure S4 Time-resolved number size distributions of (i)  $N_{\text{WIBS}}$ , (ii)  $N_{\text{FBAP}}$  and (iii) the number fraction of  $N_{\text{FBAP}}$  above canopy, July 2008**
